# Supplementary figures and images for: Biodistribution and Efficacy Studies of the Proteasome Inhibitor BSc2118 in a Mouse Melanoma Model
Source: PubMed Central journal article supplement — Transl Oncol. 2014 Oct 24;7(5):570–9. doi: 10.1016/j.tranon.2014.07.002 (PMC4225687; doi:10.1016/j.tranon.2014.07.002), 2014-10-24

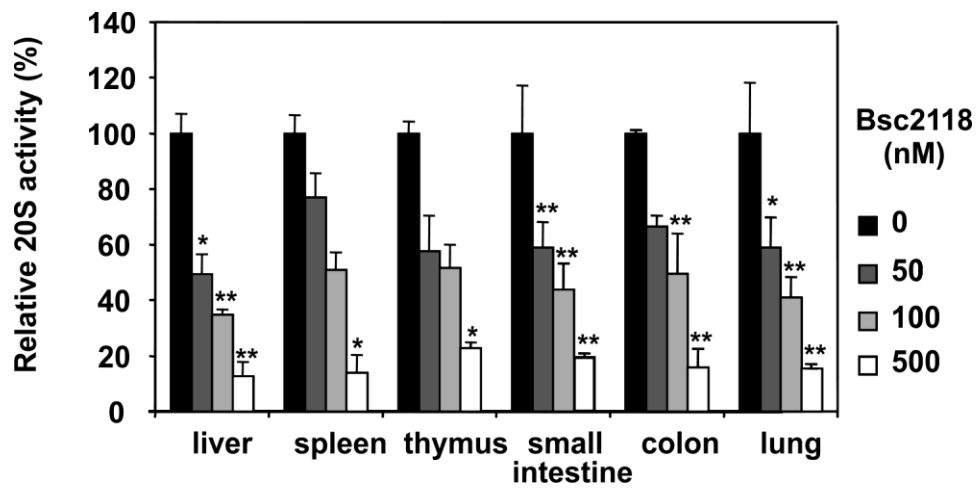

Suppl. Fig. 1

Supplement: mmc1.pdf [file mmc1.pdf]

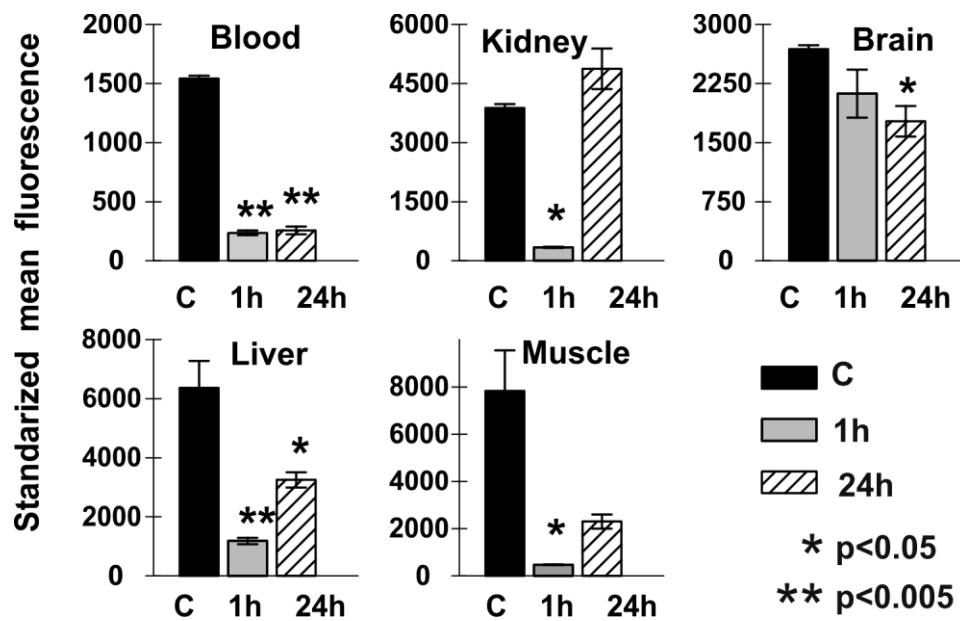

Suppl. Fig. 2

Supplement: mmc2.pdf [file mmc2.pdf]
